# Supplementary material for: Inverse association between dietary vitamins and hyperuricemia risk: a cross-sectional study.
Source: Research Square preprint supplement (doi:10.21203/rs.3.rs-6493362/v1), 2025-05-07
Supplement: Supplementary file 1 [file 3d0cf26eb5f77ca34dac2e0a.docx]

**Graphical Abstract Legend**

Analysis of 23851 U.S adults from NHANES 2007-2018 indicates that the overall effect of dietary vitamins on HUA risk is protective. Vitamins B1, B2, B3, C, D, and E emerged as key contributors. Moderately increasing intake of vitamins B1, B2, C, D, and E while reducing vitamin B3 consumption may help mitigate HUA risk.Abbreviations: HUA: Hyperuricemia; NHANES: National Health and Nutrition Examination Survey; Qgcomp: Quantile-based g-computation; WQS: Weighted quantile sum.
