# Supplementary material for: Inverse association between dietary vitamins and hyperuricemia risk: a cross-sectional study.
Source: Research Square preprint supplement (doi:10.21203/rs.3.rs-6493362/v1), 2025-05-07
Supplement: Supplementary file 2 [file d795ca8f929b00129ac17b4b.docx]

Highlights

- Vitamins A, B1, B2, B9, B12, C, D, and E are negatively associated with hyperuricemia(HUA), while vitamin B3 is positively associated with HUA.
- In the female population, only a negative association between vitamin B2 and HUA was observed.
- The total effect of dietary vitamins on the risk of HUA shows a negative effect, vitamins B1, B2, B3, C, D, and E emerged as key contributors.
